# Supplementary material for: The Class I HDAC Inhibitor, MS-275, Prevents Oxaliplatin-Induced Chronic Neuropathy and Potentiates Its Antiproliferative Activity in Mice
Source: MDPI journal article supplement (doi:10.3390/ijms23010098), 2021-12-22
Supplement: s1 [file s1]

## Supplementary Table S1

### RESEARCH ARTICLE:

Title: The class I HDAC inhibitor, MS-275, prevents oxali-platin-induced chronic neuropathy and potentiates its antipro-liferative activity in mice

**Authors:** Sylvain LAMOINE<sup>1†</sup>, MéliSSa CUMENAL<sup>1†</sup>, David A. BARRIERE<sup>1</sup>, Vanessa PEREIRA<sup>1</sup>, Mathilde FERAYROLLES<sup>1</sup>, Laëtitia PRIVAL<sup>1</sup>, Julie BARBIER<sup>1</sup>, Ludivine BOUDIEU<sup>1</sup>, Emilie BRASSET<sup>3</sup>, Benjamin BERTIN<sup>3</sup>, Yoan RENAUD<sup>3</sup>, Elisabeth MIOT-NOIRAULT<sup>4</sup>, Marie-Ange CIVIALE<sup>5</sup>, David BALAYSSAC<sup>1,6</sup>, Youssef AISSOUNI<sup>1</sup>, Alain ESCHALIER<sup>1,2</sup> and Jérôme BUSSEROLLES<sup>1\*</sup>

| FIGURE NUMBER | TEST USED?       | n = ?          | DEFINED?           | REPORTED?   | ANOVA MAIN EFFECTS             | P VALUE                                | DEGREE OF FREEDOM & F/t/z/R etc value                    | SECTION & PARAGRAPH |
|---------------|------------------|----------------|--------------------|-------------|--------------------------------|----------------------------------------|----------------------------------------------------------|---------------------|
| 1B kinetics   | Two-way RM ANOVA | 9 per group    | mice from 2 groups | mean +/- SM | TREATMENT TIME INTERACTION     | p < 0.0001<br>p < 0.0001<br>p < 0.0001 | F(1.16) = 160.1<br>F(4.64) = 18.72<br>F(4.64) = 38.24    | Fig. legend         |
| 1C Kinetics   | Two-way RM ANOVA | 9 per group    | mice from 2 groups | mean +/- SM | TREATMENT TIME INTERACTION     | p < 0.0001<br>p = 0.0066<br>p = 0.0193 | F(1.16) = 35.21<br>F(4.64) = 3.917<br>F(4.64) = 3.171    | Fig. legend         |
| 3B Kinetics   | Two-way RM ANOVA | 6 per group    | mice from 4 groups | mean +/- SM | TREATMENT TIME INTERACTION     | p < 0.0001<br>p = 0.0004<br>p = 0.0174 | F(3.2) = 38.62<br>F(4.8) = 5.698<br>F(12.8) = 2.232      | Fig. legend         |
| 3C Kinetics   | Two-way RM ANOVA | 6 per group    | mice from 4 groups | mean +/- SM | TREATMENT TIME INTERACTION     | p = 0.0002<br>p < 0.0001<br>p = 0.0035 | F(3.2) = 10.38<br>F(4.8) = 14.71<br>F(12.8) = 2.737      | Fig. legend         |
| 3D kinetics   | Two-way RM ANOVA | 6 per group    | mice from 4 groups | mean +/- SM | SPADIN RILUZOLE INTERACTION    | p = 0.0143<br>p < 0.0001<br>p < 0.0001 | F(3.2) = 4.453<br>F(4.8) = 7.865<br>F(12.8) = 5.329      | Fig. legend         |
| 3E            | Two-way ANOVA    | 6 per group    | mice from 4 groups | mean +/- SM | OXALIPLATIN MS-275 INTERACTION | p < 0.0001<br>p = 0.7926<br>p = 0.0805 | F(1.2) = 45.39<br>F(1.2) = 0.071<br>F(1.2) = 3.389       | Fig. legend         |
| 3F            | Two-way ANOVA    | 6 per group    | mice from 4 groups | mean +/- SM | OXALIPLATIN MS-275 INTERACTION | p = 0.5441<br>p < 0.0001<br>p = 0.6229 | F(1.2) = 0.3796<br>F(1.2) = 34.04<br>F(1.2) = 0.2488     | Fig. legend         |
| 3G            | Two-way ANOVA    | 6 per group    | mice from 4 groups | mean +/- SM | OXALIPLATIN MS-275 INTERACTION | p = 0.5638<br>p = 0.6911<br>p = 0.9272 | F(1.2) = 0.344<br>F(1.2) = 0.1624<br>F(1.2) = 0.0086     | Fig. legend         |
| 3H            | Two-way ANOVA    | 6 per group    | mice from 4 groups | mean +/- SM | OXALIPLATIN MS-275 INTERACTION | p = 0.2037<br>p = 0.6351<br>p = 0.0443 | F(1.2) = 1.727<br>F(1.2) = 0.2322<br>F(1.2) = 4.608      | Fig. legend         |
| 4B D0         | Two-way ANOVA    | 6-15 per group | mice from 4 groups | mean +/- SM | OXALIPLATIN MS-275 INTERACTION | p = 0.8212<br>p = 0.3707<br>p = 0.7309 | F(1.41) = 0.0518<br>F(1.41) = 0.8193<br>F(1.41) = 0.1199 | Fig. legend         |
| 4B D3         | Two-way ANOVA    | 6-15 per group | mice from 4 groups | mean +/- SM | OXALIPLATIN MS-275 INTERACTION | p = 0.3636<br>p = 0.4121<br>p = 0.4    | F(1.41) = 0.8442<br>F(1.41) = 0.6866<br>F(1.41) = 0.7232 | Fig. legend         |
| 4B D7         | Two-way ANOVA    | 6-15 per group | mice from 4 groups | mean +/- SM | OXALIPLATIN MS-275 INTERACTION | p = 0.0973<br>p = 0.004<br>p = 0.0796  | F(1.41) = 2.879<br>F(1.41) = 9.301<br>F(1.41) = 3.231    | Fig. legend         |

|           |                      |                |                          |               |                                |                                        |                                                         |             |
|-----------|----------------------|----------------|--------------------------|---------------|--------------------------------|----------------------------------------|---------------------------------------------------------|-------------|
| 4B D10    | Two-way ANOVA        | 6-15 per group | mice from 4 groups       | mean +/- SM   | OXALIPLATIN MS-275 INTERACTION | p = 0.0953<br>p = 0.0011<br>p = 0.1298 | F(1.41) = 2.915<br>F(1.41) = 12.41<br>F(1.41) = 23.9    | Fig. legend |
| Table 1   | Kruskal-Wallis ANOVA | 6-15 per group | mice from 4 groups       | mean survival |                                | p = 0.0018                             |                                                         | Fig. legend |
| 5A        | Two-way ANOVA        | 3, 3           | T84 cells from 2 groups  | mean +/- SM   | TREATMENT DOSE INTERACTION     | p < 0.0001<br>p < 0.0001<br>p < 0.0001 | F(2.6) = 327.8<br>F(7.42) = 29.45<br>F(14.42) = 4.762   | Fig. legend |
| 5B        | Two-way ANOVA        | 3, 3           | HT29 cells from 2 groups | mean +/- SM   | TREATMENT DOSE INTERACTION     | p < 0.0001<br>p < 0.0001<br>p < 0.0001 | F(2.6) = 138.0<br>F(7.42) = 158.4<br>F(14.42) = 15.2    | Fig. legend |
| 5C        | Two-way ANOVA        | 3, 3, 3, 3     | T84 cells from 4 groups  | mean +/- SM   | OXALIPLATIN MS-275 INTERACTION | p < 0.0001<br>p = 0.9492<br>p = 0.1667 | F(1.8) = 263.8<br>F(1.8) = 0.0043<br>F(1.8) = 2.314     | Fig. legend |
| 5D        | Two-way ANOVA        | 3, 3, 3, 3     | HT29 cells from 4 groups | mean +/- SM   | OXALIPLATIN MS-275 INTERACTION | p < 0.0001<br>p < 0.0001<br>p = 0.0001 | F(1.8) = 181.9<br>F(1.8) = 64.65<br>F(1.8) = 50.50      | Fig. legend |
| 5E G0/G1  | Two-way ANOVA        | 3, 3, 3, 3     | T84 cells from 4 groups  | mean +/- SM   | OXALIPLATIN MS-275 INTERACTION | p < 0.0001<br>p = 0.1126<br>p = 0.1714 | F(1.8) = 489.1<br>F(1.8) = 3.176<br>F(1.8) = 2.257      | Fig. legend |
| 5E S      | Two-way ANOVA        | 3, 3, 3, 3     | HT29 cells from 4 groups | mean +/- SM   | OXALIPLATIN MS-275 INTERACTION | p < 0.0001<br>p = 0.1269<br>p = 0.1634 | F(1.8) = 162.2<br>F(1.8) = 2.902<br>F(1.8) = 2.355      | Fig. legend |
| 5E G2/M   | Two-way ANOVA        | 3, 3, 3, 3     | T84 cells from 4 groups  | mean +/- SM   | OXALIPLATIN MS-275 INTERACTION | p = 0.4514<br>p = 0.3629<br>p = 0.3619 | F(1.8) = 0.6266<br>F(1.8) = 0.9309<br>F(1.8) = 0.9348   | Fig. legend |
| 5F G0/G1  | Two-way ANOVA        | 3, 3, 3, 3     | HT29 cells from 4 groups | mean +/- SM   | OXALIPLATIN MS-275 INTERACTION | p < 0.0001<br>p < 0.0001<br>p = 0.0192 | F(1.8) = 364.5<br>F(1.8) = 66.84<br>F(1.8) = 8.554      | Fig. legend |
| 5F S      | Two-way ANOVA        | 3, 3, 3, 3     | T84 cells from 4 groups  | mean +/- SM   | OXALIPLATIN MS-275 INTERACTION | p < 0.0001<br>p < 0.0001<br>p = 0.6678 | F(1.8) = 75.07<br>F(1.8) = 89.5<br>F(1.8) = 0.1984      | Fig. legend |
| 5F G2/M   | Two-way ANOVA        | 3, 3, 3, 3     | HT29 cells from 4 groups | mean +/- SM   | OXALIPLATIN MS-275 INTERACTION | p = 0.0001<br>p = 0.0026<br>p = 0.0112 | F(1.8) = 48.52<br>F(1.8) = 18.45<br>F(1.8) = 10.75      | Fig. legend |
| 6C        | Two-way ANOVA        | 5, 5, 5, 5     | T84 cells from 4 groups  | mean +/- SM   | OXALIPLATIN MS-275 INTERACTION | p = 0.0004<br>p = 0.5484<br>p = 0.9226 | F(1.16) = 19.67<br>F(1.16) = 0.3760<br>F(1.16) = 0.009  | Fig. legend |
| 6D        | Two-way ANOVA        | 5, 5, 5, 5     | HT29 cells from 4 groups | mean +/- SM   | OXALIPLATIN MS-275 INTERACTION | p = 0.0020<br>p = 0.0002<br>p = 0.3784 | F(1.16) = 13.65<br>F(1.16) = 23.34<br>F(1.16) = 0.8207  | Fig. legend |
| 6E        | Two-way ANOVA        | 5, 5, 5, 5     | T84 cells from 4 groups  | mean +/- SM   | OXALIPLATIN MS-275 INTERACTION | p = 0.0126<br>p = 0.5945<br>p = 0.6008 | F(1.16) = 7.892<br>F(1.16) = 0.2950<br>F(1.16) = 0.2849 | Fig. legend |
| 6F        | Two-way ANOVA        | 5, 5, 5, 5     | HT29 cells from 4 groups | mean +/- SM   | OXALIPLATIN MS-275 INTERACTION | p < 0.0001<br>p < 0.0001<br>p = 0.0027 | F(1.16) = 76.86<br>F(1.16) = 128.1<br>F(1.16) = 12.62   | Fig. legend |
| Suppl. 1C | Two-way ANOVA        | 5, 5, 5, 5     | T84 cells from 4 groups  | mean +/- SM   | OXALIPLATIN MS-275 INTERACTION | p = 0.0003<br>p = 0.0002<br>p = 0.6639 | F(1.16) = 20.53<br>F(1.16) = 23.38<br>F(1.16) = 0.1959  | Fig. legend |

|              |                  |               |                                |                |                                      |                                        |                                                       |                |
|--------------|------------------|---------------|--------------------------------|----------------|--------------------------------------|----------------------------------------|-------------------------------------------------------|----------------|
| Suppl.<br>1D | Two-way<br>ANOVA | 4, 4, 4,<br>4 | HT29 cells<br>from 4<br>groups | mean<br>+/- SM | OXALIPLATIN<br>MS-275<br>INTERACTION | p = 0.2046<br>p = 0.0077<br>p = 0.8588 | F(1.12) = 1.799<br>F(1.12) = 10.2<br>F(1.12) = 0.033  | Fig<br>legend  |
| Suppl.<br>1E | Two-way<br>ANOVA | 5, 5, 5,<br>5 | T84 cells<br>from 4<br>groups  | mean<br>+/- SM | OXALIPLATIN<br>MS-275<br>INTERACTION | p = 0.0004<br>p < 0.0001<br>p = 0.3297 | F(1.16) = 19.43<br>F(1.16) = 44.31<br>F(1.16) = 1.011 | Fig.<br>legend |
| Suppl.<br>1F | Two-way<br>ANOVA | 5, 5, 5,<br>5 | HT29 cells<br>from 4<br>groups | mean<br>+/- SM | OXALIPLATIN<br>MS-275<br>INTERACTION | p < 0.0001<br>p < 0.0001<br>p = 0.0027 | F(1.16) = 76.86<br>F(1.16) = 128.1<br>F(1.16) = 12.62 | Fig<br>legend  |
