# Supplementary material for: The Class I HDAC Inhibitor, MS-275, Prevents Oxaliplatin-Induced Chronic Neuropathy and Potentiates Its Antiproliferative Activity in Mice
Source: MDPI journal article supplement (doi:10.3390/ijms23010098), 2021-12-22
Supplement: s1 [file s1]

**Table 1 : Effect of oxaliplatin and MS-275 on mean and median survival**

|                                   | Vehicle        | Oxaliplatin     | MS-275            | Oxaliplatin MS-275 |
|-----------------------------------|----------------|-----------------|-------------------|--------------------|
| <b>Mean survival<br/>(days)</b>   | 16.85 +/- 2.76 | 25.23 +/- 11.37 | 30.50 +/- 10.71 * | 34.13 +/- 8.79 **  |
| <b>Median Survival<br/>(days)</b> | 17             | 19              | 30.5              | 36                 |
